# Supplementary material for: Efficient elimination of U(vi) by polyethyleneimine-decorated fly ash
Source: Royal Society of Chemistry journal article supplement (doi:10.1039/c8qi00253c), 2018-01-01
Supplement: c8qi00253c1.pdf [file c8qi00253c1.pdf]

## Electronic Supplementary Information

### Efficient elimination of U(VI) by polyethyleneimine decorated fly ash

Hongwei Pang,<sup>a</sup> Shuyi Huang,<sup>a</sup> Yihan Wu,<sup>a</sup> Dongxu Yang,<sup>a</sup> Xiangxue Wang,<sup>\*a,b</sup>  
Shujun Yu,<sup>\*a</sup> Zhongshan Chen,<sup>a</sup> Ahmed Alsaedi,<sup>c</sup> Tasawar Hayat<sup>c</sup> and Xiangke  
Wang<sup>\*a,c,d</sup>

a. College of Environmental Science and Engineering, North China Electric Power University, Beijing 102206, PR China.

b. Department of Environmental Science and Engineering, North China Electric Power University, Baoding 071003, PR China.

c. NAAM Research Group, Faculty of Science, King Abdulaziz University, Jeddah 21589, Saudi Arabia.

d. Collaborative Innovation Center of Radiation Medicine of Jiangsu Higher Education Institutions and School for Radiological and Interdisciplinary Sciences, Soochow University, 215123, Suzhou, P.R. China.

Email: wang730304@163.com, sjyu@ncepu.edu.cn, xkwang@ncepu.edu.cn;

Fax: +86-10-61772890; Tel: +86-10-61772890

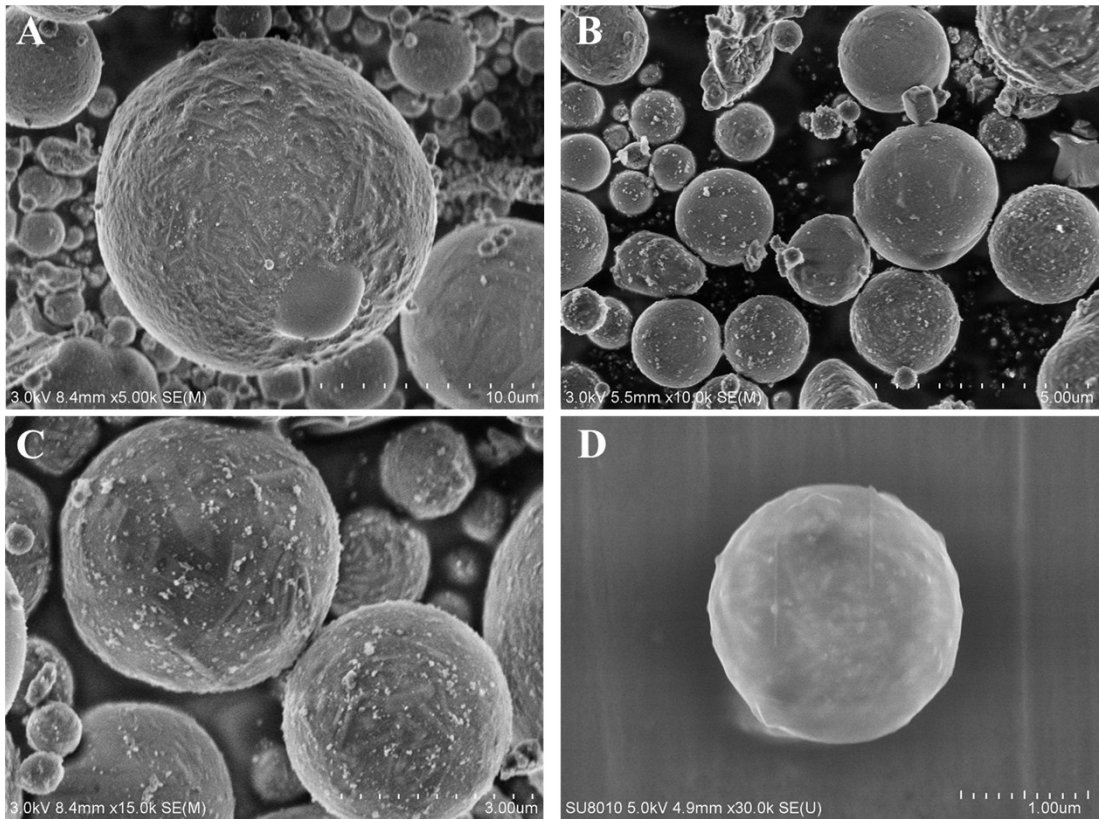

Fig. S1 The SEM images of FA (A), FA@PEI (B and C) and U(VI) loaded FA@PEI (D).

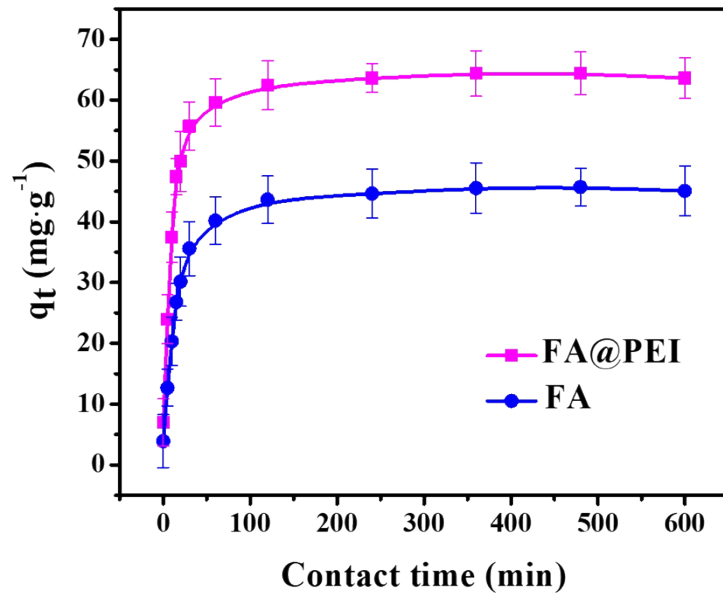

Fig. S2 Adsorption kinetic curves of U(VI) adsorption capacity ( $q_t$ ) on FA and FA@PEI.
